# Supplementary material for: A Model System for Sensitive Detection of Viable E. coli Bacteria Combining Direct Viability PCR and a Novel Microarray-Based Detection Approach
Source: MDPI journal article supplement (doi:10.3390/chemosensors9120357), 2021-12-13
Supplement: s1 [file s1 › chemosensors-1461376-supplementary.pdf]

# Supplemantary materials

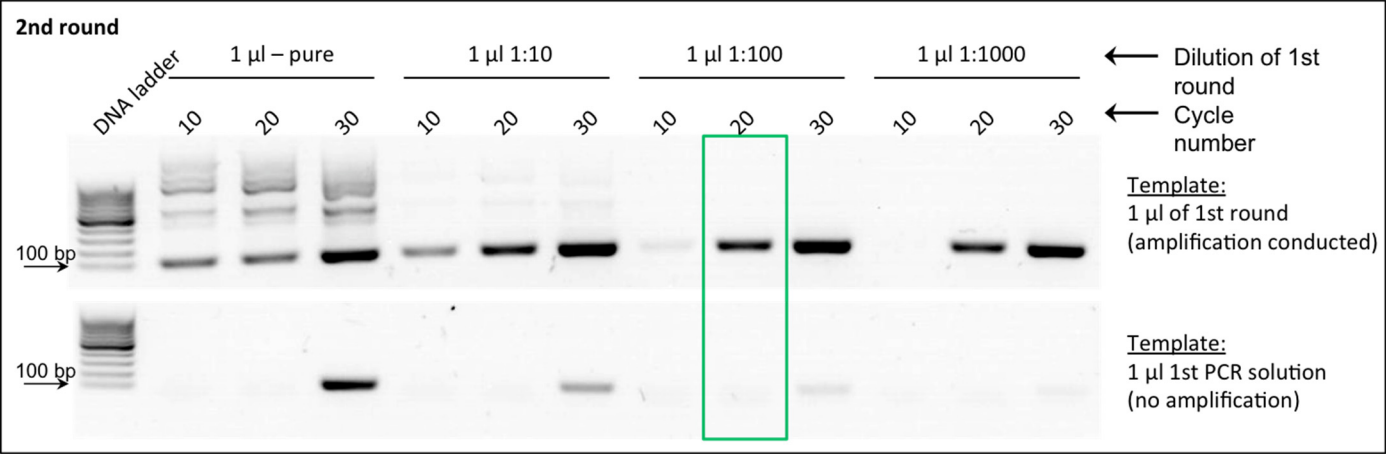

**Figure S1.** Analytical agarose gel showing the investigation of different parameters for optimizing nested PCR conditions.

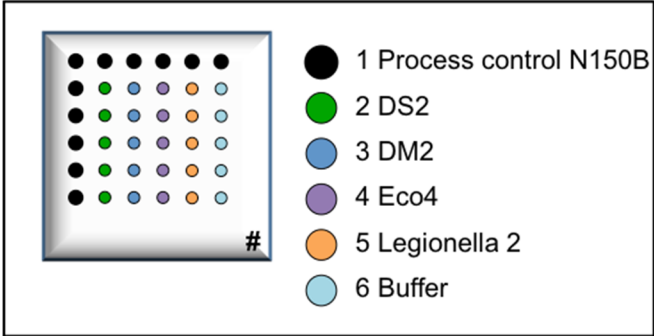

**Figure S2.** Spot layout for the capture probes.
